# Supplementary material
Source: PubMed Central journal article supplement (PMC2797064)
Supplement: emboj2009354s1.pdf [file emboj2009354s1.pdf]

**Supplementary Figure 1:** Bioinformatic analysis of Lag2 and Cand1-like sequences from different species

The alignment was produced by the MAFFT program, using the L-INS-I algorithm (Kato et al. 2005). Similar residues (Sim) are coloured depending on the level of similarity as follows: Sim>3.0 cyan, Sim>1.5 midblue and Sim>0.5 lightgray. The following species are included in the alignment: Yeast: *S. cerevisiae*, CANGA: *C. glabrata*, VANPO: *V. polyspora*, SCHPO: *S. pombe*, NEUCR: *N. crassa*, CAEEL: *C. elegans*; HUMAN: *H. sapiens*, DROME: *D. melanogaster*, ARATH: *A. thaliana*, CANAL: *C. albicans*

**Supplementary Figure 2:** Cdc53 and Lag2 interact by two-hybrid assay, and Lag2 does not co-immunoprecipitate with Skp1

**A:** The interaction between Cdc53 fused to LexA-DNA binding domain and Lag2 fused to activation domain was assessed by two-hybrid assay using the LexA-LacZ reporter assay. An empty plasmid (ev) served as a negative control.  $\beta$ -galactosidase activity was normalized in Miller Units; the average of at least three experiments with standard deviations is shown.

**B:** Extracts prepared from wild type cells were immunoprecipitated with either control IgG or Skp1-specific antibodies, and bound proteins were immunoblotted as indicated with Cdc53, Lag2 or Skp1 antibodies. One percent of total extracts were loaded as input (sup).

**Supplementary Figure 3:** Analysis of the purified components by SDS-PAGE

**A:** Coomassie-stained SDS-PAGE gel showing 1.5 micrograms of the purified *S. cerevisiae* proteins used for *in vitro* assays. The Molecular Weight Marker (BioRad) is shown on the left (lane 1).

**B:** Purified proteins were mixed in the indicated molar ratios and incubated for 30 minutes on ice in 25mM Tris pH=7.6 50mM NaCl 8% Glycerol 1mM DTT. Samples were ran at 130V on native gels for 100 minutes, and visualized by coomassie blue staining.

**Supplementary Figure 4:** Wild type and non-neddylatable Lag2-K16R prevent Cdc53 neddylation *in vitro* with comparable efficiency

Purified Cdc53-Hrt1 complexes were subjected to neddylation reactions as described in Material and Methods in the presence of [<sup>32</sup>P]-Rub1, and analyzed by autoradiography after the times indicated. Where indicated, the complexes were pre-incubated for 30 minutes with purified wild type Lag2 or non-neddylatable Lag2<sup>K16R</sup>. The neddylation efficiency of Cdc53 was normalized by phosphorimager analysis from at least three experiments and plotted against time (minutes). Diamonds: no addition; squares: pre-incubation with wild type Lag2; diamonds: pre-incubation with Lag2<sup>K16R</sup>.

**Supplementary Figure 5:** Dcn1 interacts with the Cdc53/Hrt1/Lag2 complex *in vitro*, but does not trigger Lag2 removal *in vitro* or *in vivo*

**A:** Purified Dcn1 or the Dcn1 PONY domain does not bind to Lag2 directly, but may bind to Cdc53/Hrt1/Lag2 complexes *in vitro* as analyzed by native gel shift analysis. Proteins were mixed in the indicated molar ratios and incubated for 30 minutes on ice in 25mM Tris pH=7.6 50mM NaCl 8% Glycerol 1mM DTT. Samples were ran on native gels for 30 minutes, and visualized by coomassie blue staining. Note that Dcn1 and Lag2 do not appear to bind by native gel shift analysis, but due to the size and PI of Dcn1 and Lag2 they run at nearly identical positions in the native gels. We thus also analyzed the PONY domain of Dcn1, which fully complements the Dcn1 function when expressed in *dcn1Δ* cells *in vivo* (Kurz et al., 2008). The PONY domain of Dcn1 has a lower PI than full-length and hence migrates more rapidly in the native gels. Indeed, Dcn1 and the Dcn1 PONY domain may form a trimeric complex with Cdc53 and Lag2 *in vitro*.

**B:** Purified Cdc53-Hrt1 complexes were subjected to neddylation reactions as described in Material and Methods in the presence of [<sup>32</sup>P]-Rub1, and analyzed by autoradiography after the times indicated (minutes). Where indicated (+), the complexes were pre-incubated (pre-incubate) for 30 minutes with purified Dcn1 or Lag2. The neddylation reaction was started by addition of [<sup>32</sup>P]-Rub1 in the presence (+) or absence (-) of purified Dcn1 (inject). Note that neither pre-incubation nor initiation of the rubylation reaction with Dcn1 affected the inhibitory effect of Lag2 *in vitro*.

**C:** Total cell extract prepared from wild type (wt), *lag2Δ*, *dcn1Δ*, and *dcn1Δ lag2DΔ* cells were analyzed by immunoblotting with antibodies against Cdc53 (upper panel) and Lag2

(lower panel). Note that deletion of Lag2 does not significantly alter the neddylation state of Cdc53 in wild type and *dcn1* $\Delta$  cells.

**Supplementary Figure 6:** Genetic interaction of Lag2 and Skp1

Five fold serial dilutions of an equal number of *skp1-12* (upper plates) and *skp1-12 lag2* $\Delta$  (lower plates) transformed with an empty control plasmid (ev) or plasmids allowing as indicated overexpression of wild type Lag2 or Lag2<sup>GN(551)</sup> from the regulatable *GALI,10*-promoter, were spotted on media containing galactose (*GAL*-promoter on). The plates were photographed after three days at the semi-permissive temperatures of 30<sup>0</sup>C (left plates) or 33<sup>0</sup>C (right plates). Note that overexpression of functional Lag2 is toxic in cells compromised for Skp1 activity.

**Supplementary Figure 7:** Lag2 specifically interacts with the Cul4-type cullin Rtt101 by GST-pull-down

Extracts prepared from cells expressing Myc-tagged Rtt101 were incubated with beads coated with GST alone or Lag2-GST. After extensive washing, bound proteins were eluted with gel-loading buffer and visualized by immunoblotting with antibodies recognizing the Myc-tag. An aliquot of the input (sup) controls for the presence of Rtt101 in the extract.

**Supplementary Figure 8:** Only a small fraction of Lag2 co-fractionates with Cdc53 in rapidly growing yeast cells

Extracts from exponentially growing wild type cells were separated on a Sepharose 6 gel filtration column, and selected fractions (1 – 13) analyzed by immunoblotting with antibodies against Cdc53 (upper panel), Lag2 (middle panel) and Skp1 (lower panel). An aliquot of the input (sup) was included for control of the extract. The position of the molecular weight markers is indicated on top.

**Supplementary Table 1:** Bioinformatic analysis of selected species for the presence of Lag2 or CAND1-like proteins

The indicated genomes were analyzed by multiple sequence alignments (Kato et al., 2005) for the presence of Lag2 or CAND1-like proteins. Depicted in gray are yeast species. The analysis suggests that many fungal species carry a Lag2-like protein, while other yeast species, *C. elegans*, *D. melanogaster*, and mammalian species encode a CAND1-like protein instead.

Kato, K., K. Kuma, H. Toh & T. Miyata (2005) MAFFT version 5: improvement in accuracy of multiple sequence alignment. *Nucleic Acids Res*, 33, 511-8.



LAG2\_YEAST 1 .....MSLHISKLIEQYRSTKNDLKYMLLR.....QNFKINDIEDELAPLVNELLPLVLEVEQDMEILNIVSFOVLPDLVLS..
Q6FY07\_CANGA 1 .....MEVSSLIIEYNNAKNDFRYMLTK.....QPVLIRSIQKDFDKLMANLYLPVLTNVDSELOQLVSFEVLPRAVLS..
A7TLH2\_VANPO 1 .....MDVKDAVSKYKETNDVVKYMLLR.....QDFKIETIPNDLVHLLNQLFPILNNEIDLEIDLVSSVEVFPVVKKGG

LAG2\_YEAST 74 ..MI..SDPAAALQGLVWIGL.....ICDPLLQSMIHANRSFV.....LIETLRNVLOK.....
Q6FY07\_CANGA 72 ..LFD..SQVEEYNSGLMWAYIERVYFYP..IDSLESGN..ETITNL..LVQSLRNINIL.....
A7TLH2\_VANPO 73 ..LLET..SINGMYNANFMLOY.....IEPFLRDN..ESRNTM..MITLRNLINKNI.....

LAG2\_YEAST 119 .....IENSPHLDYH.....QPVNSSLEFISKFIVEMKRHMCDVDAQAQLSHSSE.....
Q6FY07\_CANGA 125 .....ISNDLNKISVTRNDQILSDNY.....QSKYQDEEFMKLVSFMLEKSEQKETTAVGLQG.....
A7TLH2\_VANPO 118 .....DSKKIIVD.....KSGAEEIIRYPIEFHNKHNESYS.....

LAG2\_YEAST 164 .....SNMLIYESLNLKLF.....
Q6FY07\_CANGA 177 .....YOBTKLIEV.....
A7TLH2\_VANPO 149 .....SNRMVYWTETLLLLQF.....

LAG2\_YEAST 180 .....SFSDAASPVMVTLPFDIINDVFTIAQ..DYSAT.....
Q6FY07\_CANGA 188 .....SYDC.....RLRFLSPKALMKCIESL.....
A7TLH2\_VANPO 165 .....ELSTDIKSAIF.....

LAG2\_YEAST 213 .....NTNESIDRITEKLLLTSTOLT.....
Q6FY07\_CANGA 209 .....HDYEDYNTSSEMLLNKVIENT.....
A7TLH2\_VANPO 187 .....TNNGLDSSIKDCLVYITKNT.....

LAG2\_YEAST 234 HPV.....DLENLCPMKYNTLAAVSRIWYKFGPIVDKLFTRNLIP.....
Q6FY07\_CANGA 230 DIA.....AVAQTOQYFSLSNLKFMKSNKYKFAECSSGII..PKLID.....
A7TLH2\_VANPO 208 SNN.....ELSRIVEIASFDIEIISVVWNKFNVEKLLDRRIIP.....

LAG2\_YEAST 275 VLFPPOGMEECNVED.....VLEIVHNFHIFYF.....SIRRLKDNRPPLSDBSTISQ.....LREGI.....FGM
Q6FY07\_CANGA 270 EI..TKETEKSDISK.....MLBIISNLKDYL.....LQGTITNEGHPKLPDLSILL.....L.....DRV
A7TLH2\_VANPO 249 ST..IRYNEEDNDISDLRLTLQTKLTLNHLKFF..DTNILLTQDESSTGIMTNNYKNTKYSIDLKSL.....LREAL.....MSL

LAG2\_YEAST 329 ..LSTLNDLSL.....TRTON.....ENDHGSDNLDSD..DGFSGSDNDPEQAYDEL...VSEGYDENMY...DGDTDDEDADDINV
Q6FY07\_CANGA 320 ..LNLTNIIPIESERDVI.....NKHNNNDLVTTESDITDIVEDIDQAYLDELIDAGMSSNYDELDSTVDFEGDDTSSNLEFE
A7TLH2\_VANPO 321 ..LLETSKFDVLERNET.....EYRKGFMEEDDNN..DEMELDDADQOAYLEEL.....EDDQDEPFLV





Supplementary Figure 2.

A.

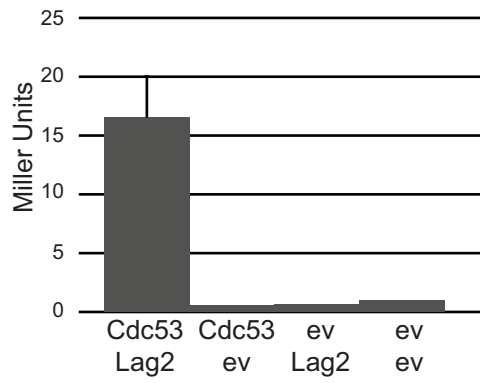

B.

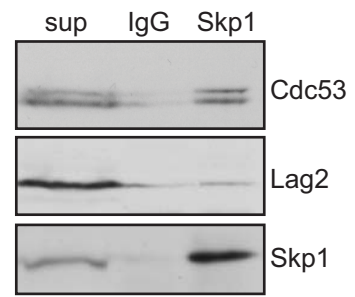

**Supplementary Figure 3.**

**A.**

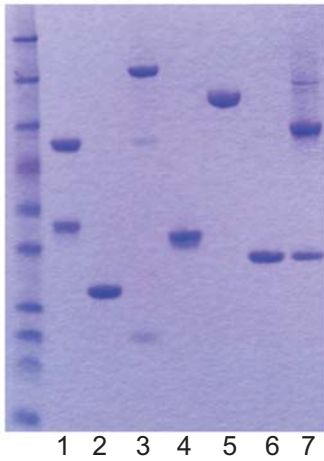

1. Markers
2. Sc Uba3/Ula1
3. Sc Ubc12
4. Sc Cdc53/Hrt1
5. Sc Dcn1
6. Sc Lag2
7. Sc Skp1
8. Sc Cdc4/Skp1

**B.**

|       |    |      |      |     |     |      |      |     |     |
|-------|----|------|------|-----|-----|------|------|-----|-----|
| Cdc53 | 1x | 1x   | 1x   | 1x  | 1x  | 1x   | 1x   | 1x  | 1x  |
| Lag2  | -  | .25x | .25x | .5x | .5x | .75x | .75x | .1x | .1x |

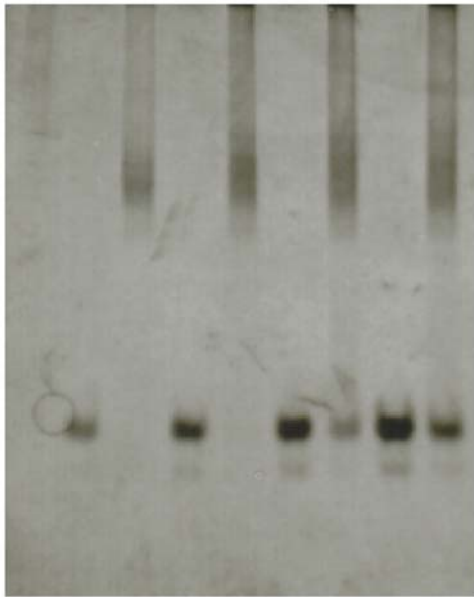

— Cdc53:Lag2

— Lag2

Supplementary Figure 4.

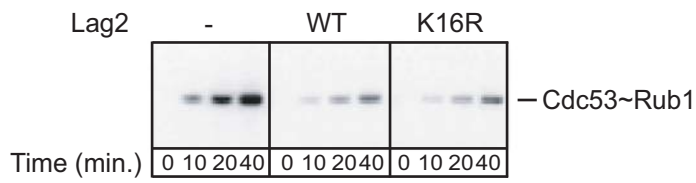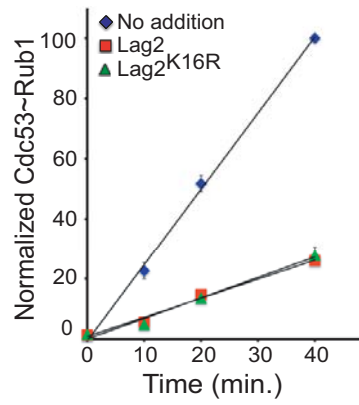

**Supplementary Figure 5.**

**A.**

|                      |    |    |    |    |    |   |    |     |    |    |     |     |     |
|----------------------|----|----|----|----|----|---|----|-----|----|----|-----|-----|-----|
| Cdc53                | -  | -  | -  | -  | -  | - | 1x | -   | -  | -  | 1x  | 1x  | 1x  |
| Lag2                 | 1x | -  | -  | 1x | 1x | - | -  | .7X | -  | -  | .7X | .7X | .7X |
| Dcn1 <sup>PONY</sup> | -  | -  | 1x | -  | 1x | - | -  | -   | -  | 1x | -   | -   | 1x  |
| Dcn1                 | -  | 1x | -  | 1x | -  | - | -  | -   | 1x | -  | -   | 1x  | -   |

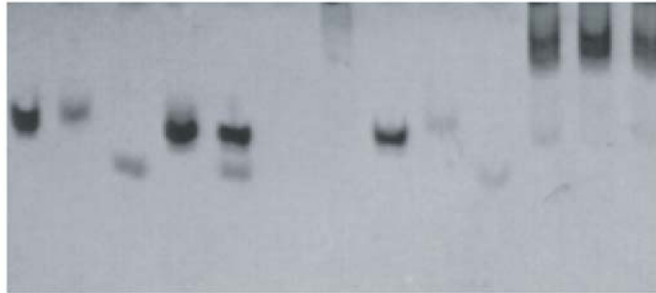

— Cdc53:~Lag2 / Cdc53:~Lag2:Dcn1 / Cdc53:~Lag2:Dcn1<sup>PONY</sup>  
 — Lag2 / Dcn1  
 — Dcn1<sup>PONY</sup>

**B.**

**Pre-Incubate**

|       |   |   |   |   |
|-------|---|---|---|---|
| E1,E2 | + | + | + | + |
| Dcn1  | + | + | - | - |
| Lag2  | - | + | - | + |

**Inject**

|      |   |   |   |   |
|------|---|---|---|---|
| Rub1 | + | + | + | + |
| Dcn1 | - | - | + | + |

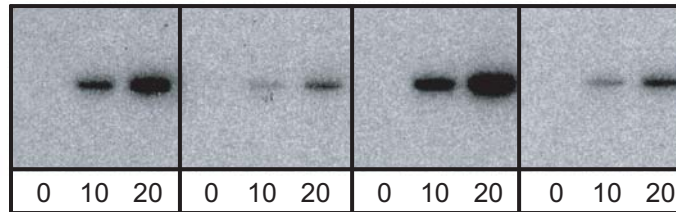

— Cdc53~Rub1

Time (min.)

**C.**

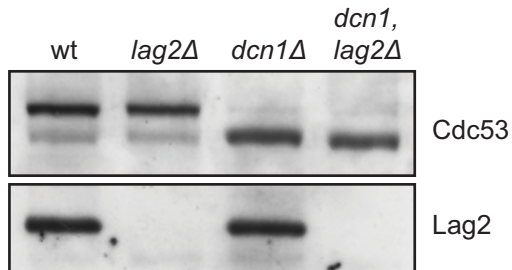

Supplementary Figure 6.

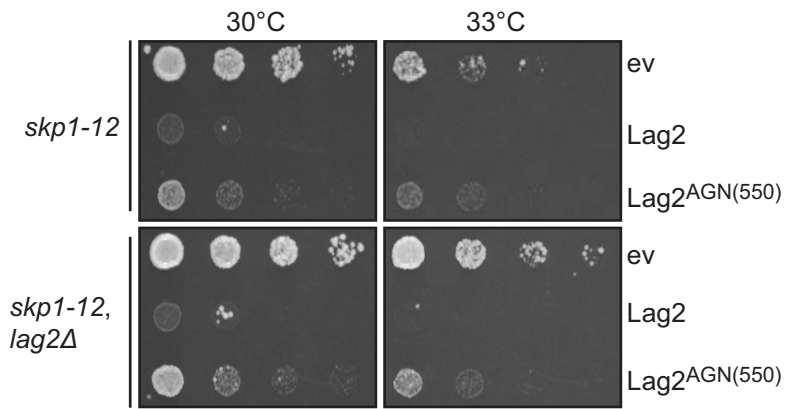

Supplementary Figure 7.

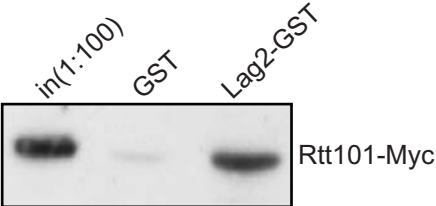

**Supplementary Figure 8.**

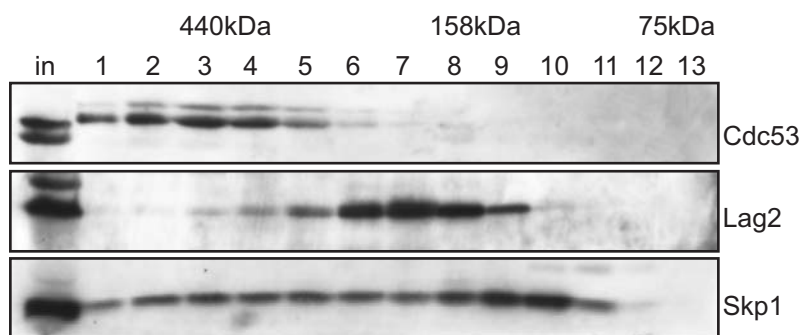

## Supplementary Tables

**Supplementary Table I. Genomes with Lag2- or Cand1-like sequence**

| <b>Genome Contains Lag2 but not Cand1</b> | <b>Genome Contains Cand1 but not Lag2</b> |
|-------------------------------------------|-------------------------------------------|
| Saccharomyces (e.g. cerevisiae, castelli) | Zygomycetes                               |
| Vanderwaltozyma polyspora                 | Basidiomycetes                            |
| Zygosaccharomyces rouxii                  | Schizosaccharomyces pombe                 |
| Candida glabrata                          | Candida albicans                          |
| Kluyveromyces thermotolerans              | Homo sapiens                              |
| Kluyveromyces waltii                      | Mus musculus                              |
| Kluyveromyces lactis                      | Drosophila melanogaster                   |
| Ashbya gossypii                           | Caenorhabditis elegans                    |
|                                           | Arabidopsis thaliana                      |

**Supplementary Table II. Plasmids used in this study**

| <b>Plasmid ID</b> | <b>Plasmid name</b>      | <b>Vector name</b>  | <b>Reference</b> |
|-------------------|--------------------------|---------------------|------------------|
| pES31             | Lag2                     | pRS426Gal1          | this study       |
| pES30             | Lag <sup>GN(551)</sup>   | pRS426Gal1          | this study       |
| pES32             | Lag2 <sup>DDYM(17)</sup> | pRS426Gal1          | this study       |
|                   | Lag2 <sup>K16R</sup>     | pRS426Gal1          | this study       |
| pES63             | Lag2                     | P41eHIS3<br>(pGR49) | this study       |
| pES64             | Lag2 <sup>DDYM(17)</sup> | P41eHIS3<br>(pGR49) | this study       |
| pES66             | Lag2 <sup>GN(551)</sup>  | P41eHIS3            | this study       |



|         |                                 |                     |                           |
|---------|---------------------------------|---------------------|---------------------------|
|         |                                 | (pGR49)             |                           |
|         | Lag2 <sup>K16R</sup>            | P41eHIS3<br>(pGR49) | this study                |
| pES46   | HA-Dcn1                         | pRD54Gal1           | Kurz et al., 2008         |
| pES47   | HA-Dcn1 <sup>DAD-</sup>         | pRD54Gal1           | Kurz et al., 2008         |
|         | HA-Rub1                         | pRD54Gal1           | this study                |
| pMT704  | Cdc53                           | pRS424              | (Willems et al.,<br>1996) |
| pMT2166 | Cdc53 K760R                     | pRS424              | (Willems et al.,<br>1996) |
| pTK260  | GST-Hrt1, Lag2, 6xHis-<br>Cdc53 |                     | this study                |
| pTK261  | GST-Hrt1, Skp1, 6xHis-<br>Cdc53 | pST39               | this study                |
|         | ScSkp1                          | pGEX(TEV)           | this study                |
|         | Lag2                            | pGEX(TEV)           | this study                |
|         | Lag2 <sup>K16R</sup>            | pGEX(TEV)           | this study                |
|         | Lag2 <sup>GN(551)</sup>         | pGEX(TEV)           | this study                |
|         | Lag2 <sup>DDYM(17)</sup>        | pGEX(TEV)           | this study                |
|         | ScUbc12                         | pGEX(TEV)           | this study                |
|         | ScDcn1                          | pGEX(TEV)           | this study                |
|         | Rub1GG                          | pGEX2TK             | this study                |
|         | His-Cdc4 <sup>267-774</sup>     | pRSFDuet            | this study                |
|         | His-Cdc4 <sup>267-774</sup>     | pRSFDuet            | this study                |

|        |                     |          |                       |
|--------|---------------------|----------|-----------------------|
|        | Cdc53               | pFASTBAC | this study            |
|        | Hrt1 <sup>8-C</sup> | pFASTBAC | this study            |
| pDH447 | Uba3/Ula1           | pGEX     | this study            |
|        | Cul1NTD             | pAL      | (Zheng et al., 2002b) |
|        | Rbx1-rbs-Cul1CTD    | pGEX     | (Zheng et al., 2002b) |
|        | CAND1               | pGEX     | (Duda et al., 2008)   |
| pMH43  | Lag2                | pJG4-6   | this study            |
| pBL54  | Cdc53               | pEG203   | (Kurz et al., 2005)   |
| pFR28  | Lag2                | pGEX     | this study            |

**Table III. Yeast strains used in this study**

| Strain ID | Strain name                                                      | Background | Reference                                                     |
|-----------|------------------------------------------------------------------|------------|---------------------------------------------------------------|
| yES47     | his3 $\Delta$ 1 leu2 $\Delta$ 0 met15 $\Delta$ 0 ura3 $\Delta$ 0 | S288C      |                                                               |
| yES49     | MATa {leu2-3,112 trp1-1 can1-100<br>ura3-1 ade2-1 his3-11,15}    | W303       |                                                               |
| yES48     | <i>lag2::kan</i>                                                 | S288C      | this study                                                    |
| yES81     | <i>lag2::kan</i>                                                 | W303       | this study                                                    |
| yES58     | <i>rub1::kan</i>                                                 | S288C      | heterozygous<br>diploid deletion<br>collection<br>(Euroscarf) |
| yES62     | <i>rub1::kan</i>                                                 | W303       | this study                                                    |

|         |                                                     |       |                                               |
|---------|-----------------------------------------------------|-------|-----------------------------------------------|
| yES59   | <i>rri1::kan</i>                                    | S288C | diploid deletion<br>collection<br>(Euroscarf) |
| yES142  | <i>lag2<sup>wl</sup>::HIS3</i>                      | S288C | this study                                    |
| yES168  | <i>lag2<sup>GN(551)</sup>::HIS3</i>                 | S288C | this study                                    |
| yES170  | <i>lag2<sup>DDYM(17)</sup>::HIS3</i>                | S288C | this study                                    |
| yES171  | <i>lag2<sup>K16</sup>::HIS3</i>                     | S288C | this study                                    |
| MTY871  | <i>cdc53-1</i>                                      | W303  | (Willems et al.,<br>1996)                     |
| MTY706  | <i>cdc53::ADE2 &lt;Cdc53 CEN&gt;</i>                | W303  | (Willems et al.,<br>1996)                     |
| MTY1752 | <i>cdc53::ADE2 &lt;Cdc53-K760R CEN<br/>TRP1&gt;</i> | W303  | (Kurz et al., 2008)                           |
| Y553    | <i>skp1-11</i>                                      | W303  | (Bai et al., 1996)??                          |
| Y555    | <i>skp1-12</i>                                      | W303  | (Bai et al., 1996)??                          |
| yES73   | <i>skp1-11 lag2::kan</i>                            | W303  | this study                                    |
| yES74   | <i>skp1-12 lag2::kan</i>                            | W303  | this study                                    |
| YTK28   | <i>dcn1::KanMX4 his3Δ leu2Δ met15Δ<br/>ura3Δ</i>    | S288C | (Kurz et al., 2005)                           |
| yES102  | <i>dcn1::nat; lag2::kan</i>                         | S288C | this study                                    |
| yES77   | <i>ubc12::kan</i>                                   | S288C | diploid deletion<br>collection<br>(Euroscarf) |
| yES78   | <i>ubc12::kan, rri1::nat</i>                        | S288C | (Kurz et al., 2005)                           |

|       |                                |       |                     |
|-------|--------------------------------|-------|---------------------|
| yES80 | <i>dcn1::kan, rri1::nat</i>    | S288C | (Kurz et al., 2005) |
| yGR97 | <i>rtt101:: MYC-RTT101-HIS</i> | S288C | this study          |
